# Supplementary material
Source: PubMed Central journal article supplement (PMC5289861)
Supplement: 939FigureS2.pdf [file 939FigureS2.pdf]

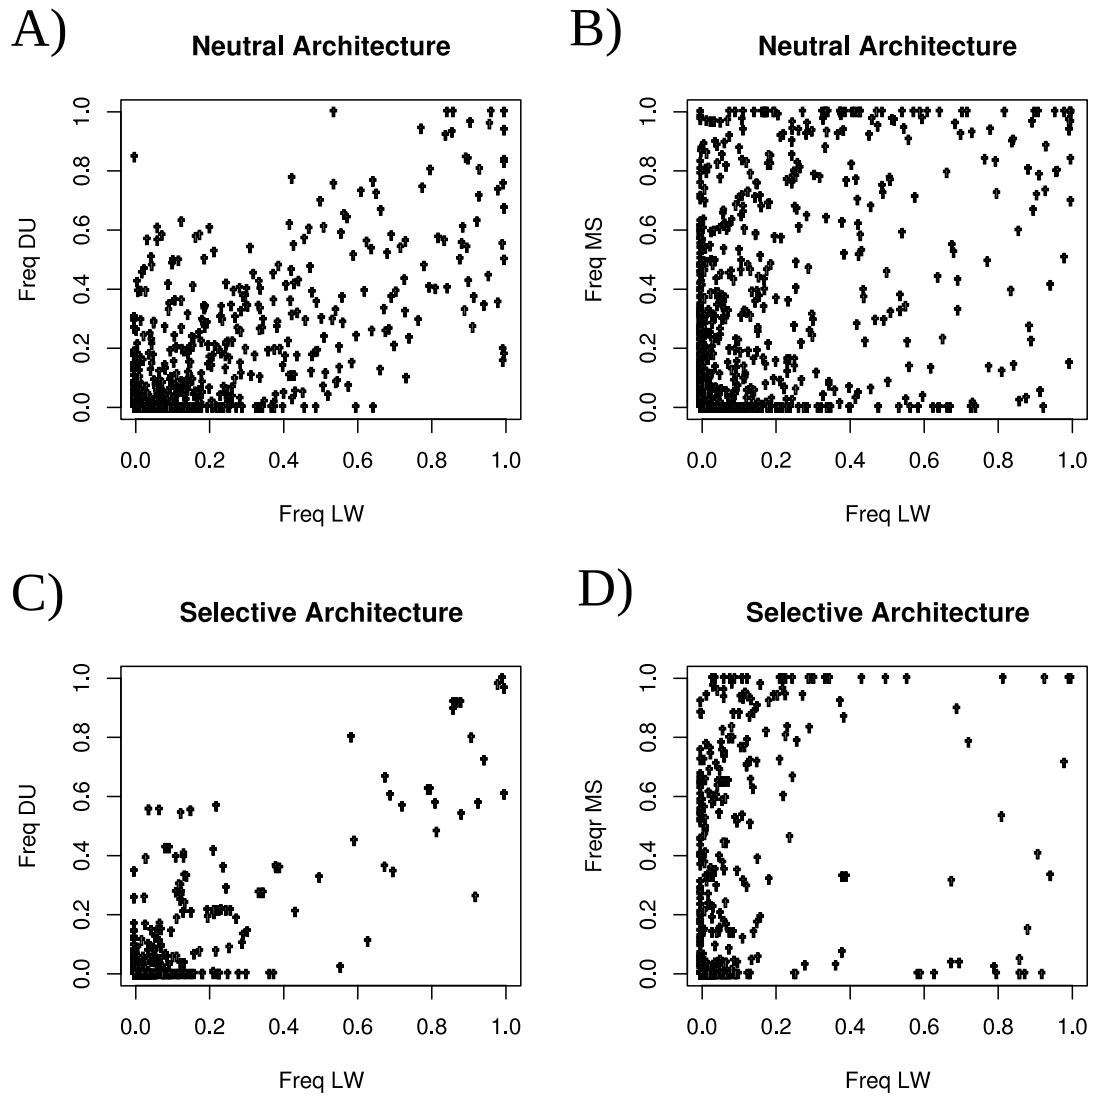

**Fig S2. Joint frequency spectra of QTNs between Large White (LW) and either Duroc (DU) or Meishan (MS) for the neutral and selective architectures.**
